# Supplementary material
Source: Springer Nature journal article supplement (https://www.springermedizin.de/resource/supplementary/13229_2014_141_MOESM4_ESM.pdf/9676280)

a) Angry

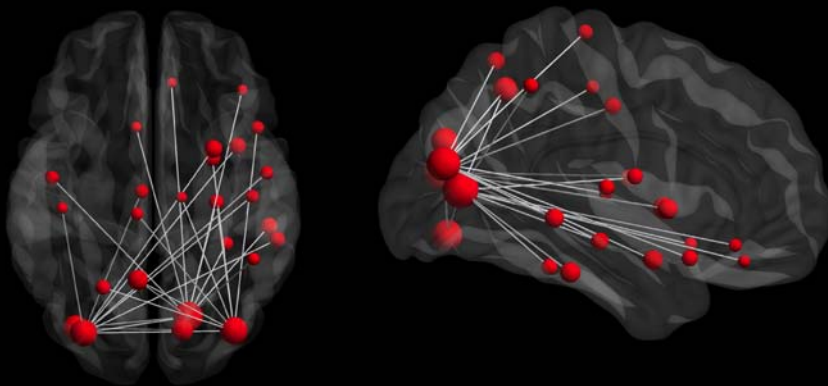

b) Happy

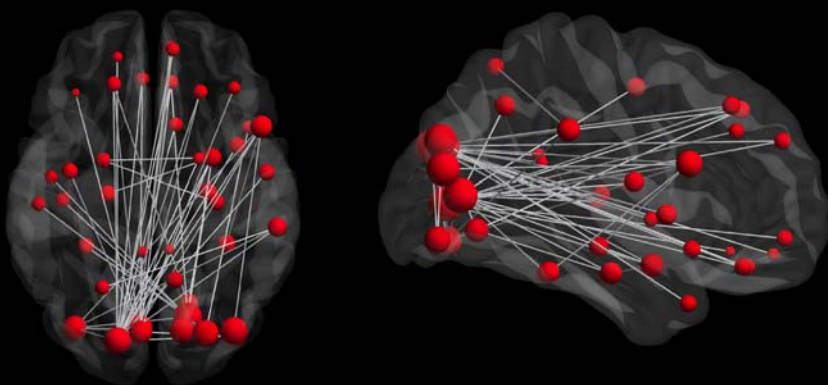

c) Neutral

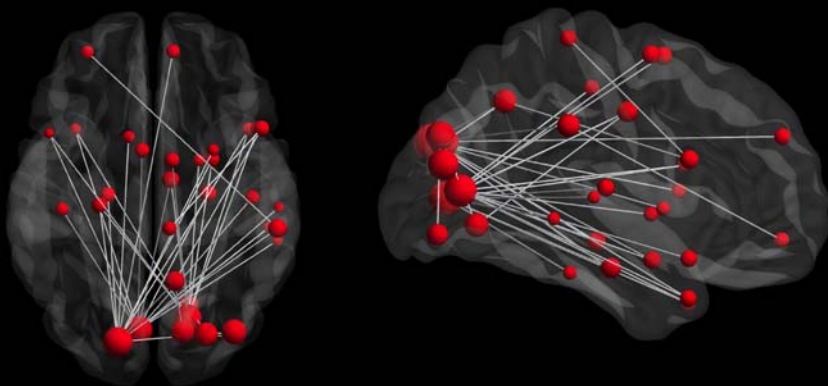

Supplement: MOESM4 [file 9676280]
